# Supplementary material for: Cancer Survival in Adults in Spain: A Population-Based Study of the Spanish Network of Cancer Registries (REDECAN)
Source: MDPI journal article supplement (doi:10.3390/cancers14102441), 2022-05-15
Supplement: s1 [file s1]

## Supplementary Material

Supplement to: Guevara, M.; Molinuevo A.; Salmerón, D.; Marcos-Gragera, R.; Carulla, M.; Chirlaque, M.-D.; Rodríguez Camblor, M.; Alemán, A.; Rojas, D.; Vizcaíno Batllés, A.; et al. Cancer Survival in Adults in Spain: A Population-Based Study of the Spanish Network of Cancer Registries (REDECAN). *Cancers* 2022.

**Supplementary Table S1.** Participating cancer registries, number of cases and periods of diagnosis included.

| <b>Cancer registry</b> | <b>N</b> | <b>First period</b> | <b>Last period</b> | <b>End of follow-up</b> |
|------------------------|----------|---------------------|--------------------|-------------------------|
| Asturias CR            | 54,417   | 2002–2007           | 2008–2010          | 2015                    |
| Canary Islands CR      | 78,733   | 2002–2007           | 2008–2013          | 2015                    |
| Castellón CR           | 26,018   |                     |                    |                         |
| Breast cancer          |          | 2002–2007           | 2008–2013          | 2015                    |
| All other cancers      |          | 2004–2007           | 2008–2013          | 2015                    |
| Ciudad Real CR         | 18,481   | 2004–2007           | 2004–2011          | 2015                    |
| Cuenca CR              | 10,161   | 2002–2007           | 2008–2011          | 2015                    |
| Basque Country CR      | 150,328  | 2002–2007           | 2008–2013          | 2015                    |
| Girona CR              | 39,695   | 2002–2007           | 2008–2013          | 2015                    |
| Granada CR             | 43,625   | 2002–2007           | 2008–2013          | 2015                    |
| La Rioja CR            | 19,099   | 2002–2007           | 2008–2013          | 2015                    |
| Mallorca CR            | 35,366   | 2003–2007           | 2008–2012          | 2015                    |
| Murcia CR              | 48,252   | 2002–2007           | 2008–2010          | 2015                    |
| Navarra CR             | 34,357   | 2002–2007           | 2008–2012          | 2015                    |
| Tarragona CR           | 42,718   | 2002–2007           | 2008–2013          | 2015                    |

Abbreviations: CR, cancer registry.

**Supplementary Table S2.** Five-year net survival by age group and sex for adult patients diagnosed with cancer in Spain in 2008–2013.

| Cancer group            | sex   | Five-year net survival (95% CI), % |                  |                  |                  |                  |
|-------------------------|-------|------------------------------------|------------------|------------------|------------------|------------------|
|                         |       | Age group                          |                  |                  |                  |                  |
|                         |       | 15-44 y                            | 45-54 y          | 55-64 y          | 65-74 y          | ≥75 y            |
| Oral cavity and pharynx | Men   | 62.5 (56.7–68.4)                   | 47.2 (44.0–50.3) | 42.4 (39.9–44.9) | 36.0 (32.9–39.0) | 27.6 (23.6–31.6) |
|                         | Women | 81.4 (74.6–88.2)                   | 67.7 (62.2–73.3) | 61.0 (55.7–66.3) | 57.2 (51.2–63.2) | 44.0 (37.7–50.4) |
|                         | Both  | 68.3 (63.7–72.9)                   | 51.6 (48.8–54.3) | 45.6 (43.3–47.9) | 40.2 (37.4–42.9) | 33.8 (30.3–37.3) |
| Esophagus               | Men   | 25.9 (14.7–37.0)                   | 16.3 (12.2–20.4) | 13.4 (10.8–16.1) | 14.3 (11.5–17.2) | 7.1 (4.6–9.5)    |
|                         | Women | 35.9 (12.3–59.4)                   | 15.3 (6.2–24.4)  | 22.2 (14.0–30.5) | 17.5 (9.3–25.6)  | 6.8 (2.5–11.1)   |
|                         | Both  | 27.7 (17.4–38.0)                   | 16.2 (12.4–19.9) | 14.5 (12.0–17.1) | 14.7 (12.0–17.3) | 7.0 (4.8–9.2)    |
| Stomach                 | Men   | 37.4 (30.6–44.2)                   | 33.6 (29.5–37.6) | 30.6 (27.8–33.4) | 26.4 (24.0–28.7) | 16.2 (14.2–18.1) |
|                         | Women | 34.0 (26.6–41.4)                   | 37.6 (31.9–43.2) | 37.0 (32.4–41.7) | 32.8 (29.2–36.4) | 18.6 (16.5–20.8) |
|                         | Both  | 35.9 (30.8–40.9)                   | 35.0 (31.7–38.3) | 32.4 (30.0–34.8) | 28.3 (26.4–30.3) | 17.3 (15.8–18.7) |
| Colon                   | Men   | 72.3 (67.5–77.1)                   | 70.3 (67.5–73.1) | 70.5 (68.8–72.2) | 65.4 (63.8–67.0) | 49.8 (48.0–51.6) |
|                         | Women | 69.9 (65.1–74.7)                   | 68.9 (65.8–71.9) | 72.4 (70.2–74.5) | 68.0 (66.0–69.9) | 49.5 (47.6–51.3) |
|                         | Both  | 71.1 (67.7–74.5)                   | 69.6 (67.6–71.7) | 71.2 (69.8–72.5) | 66.3 (65.1–67.6) | 49.7 (48.4–51.0) |
| Rectum                  | Men   | 70.5 (64.5–76.5)                   | 68.7 (65.3–72.1) | 68.5 (66.2–70.7) | 62.2 (59.9–64.4) | 46.3 (43.6–48.9) |
|                         | Women | 72.0 (64.9–79.0)                   | 72.9 (68.9–76.8) | 71.8 (68.7–74.9) | 66.2 (63.2–69.2) | 45.4 (42.4–48.5) |
|                         | Both  | 71.1 (66.5–75.7)                   | 70.4 (67.8–72.9) | 69.5 (67.7–71.3) | 63.4 (61.6–65.2) | 45.9 (43.9–48.0) |
| Liver                   | Men   | 29.5 (21.7–37.3)                   | 26.4 (23.2–29.7) | 24.3 (21.6–26.9) | 16.4 (14.1–18.6) | 8.1 (6.3–10.0)   |
|                         | Women | 39.5 (23.3–55.7)                   | 22.3 (14.1–30.5) | 24.4 (18.6–30.1) | 12.1 (8.9–15.4)  | 5.6 (3.8–7.3)    |
|                         | Both  | 31.5 (24.4–38.6)                   | 25.9 (22.9–29.0) | 24.2 (21.8–26.6) | 15.3 (13.4–17.2) | 7.1 (5.8–8.4)    |

|                            |  |       |                             |                             |                             |                             |                           |
|----------------------------|--|-------|-----------------------------|-----------------------------|-----------------------------|-----------------------------|---------------------------|
| Gallbladder and bile ducts |  | Men   | 49.5 (28.8–70.2)            | 33.8 (23.2–44.4)            | 25.2 (19.1–31.2)            | 20.5 (16.1–24.8)            | 10.4 (7.5–13.3)           |
|                            |  | Women | 43.5 (22.0–65.0)            | 23.7 (11.8–35.6)            | 21.7 (15.5–27.8)            | 18.4 (13.8–22.9)            | 10.3 (7.7–12.9)           |
|                            |  | Both  | 46.0 (30.5–61.5)            | 30.0 (22.0–37.9)            | 23.5 (19.2–27.9)            | 19.5 (16.4–22.7)            | 10.3 (8.4–12.3)           |
| Pancreas                   |  | Men   | 21.8 (14.1–29.5)            | 10.9 (7.8–14.1)             | 9.5 (7.4–11.6)              | 5.5 (4.0–7.0)               | 1.9 (0.9–3.0)             |
|                            |  | Women | 25.9 (17.0–34.7)            | 17.1 (12.1–22.2)            | 13.5 (10.3–16.8)            | 7.8 (5.8–9.7)               | 2.5 (1.6–3.4)             |
|                            |  | Both  | 23.7 (17.9–29.5)            | 13.1 (10.4–15.8)            | 10.9 (9.1–12.7)             | 6.4 (5.2–7.6)               | 2.3 (1.6–3.0)             |
| Larynx                     |  | Men   | 71.0 (62.3–79.7)            | 65.4 (61.7–69.0)            | 67.0 (64.2–69.8)            | 60.8 (57.4–64.2)            | 48.9 (43.8–54.0)          |
|                            |  | Women | 85.5 (70.3–100.7)           | 69.3 (59.2–79.3)            | 65.6 (55.7–75.4)            | 74.1 (62.6–85.7)            | 52.4 (30.7–74.0)          |
|                            |  | Both  | 73.3 (65.5–81.1)            | 65.8 (62.4–69.3)            | 66.9 (64.3–69.6)            | 61.5 (58.3–64.8)            | 49.1 (44.1–54.0)          |
| Lung                       |  | Men   | 21.0 (17.2–24.7)            | 15.4 (13.9–16.8)            | 16.0 (15.0–17.0)            | 14.2 (13.3–15.1)            | 5.5 (4.9–6.2)             |
|                            |  | Women | 29.1 (24.0–34.1)            | 21.5 (19.2–23.9)            | 22.2 (20.0–24.4)            | 19.0 (16.6–21.5)            | 8.1 (6.1–10.0)            |
|                            |  | Both  | 24.4 (21.3–27.5)            | 17.4 (16.1–18.6)            | 17.2 (16.3–18.1)            | 14.9 (14.0–15.7)            | 5.9 (5.3–6.6)             |
| Skin melanoma              |  | Men   | 88.7 (86.0–91.3)            | 85.3 (81.6–89.1)            | 82.6 (78.9–86.3)            | 78.2 (74.0–82.5)            | 71.1 (64.7–77.5)          |
|                            |  | Women | 95.8 (94.3–97.3)            | 91.3 (88.8–93.8)            | 90.4 (87.7–93.1)            | 84.7 (81.0–88.4)            | 76.1 (70.0–82.1)          |
|                            |  | Both  | 92.8 (91.3–94.2)            | 88.7 (86.6–90.9)            | 86.6 (84.3–88.9)            | 81.3 (78.4–84.1)            | 73.6 (69.2–78.0)          |
| Breast                     |  | Women | 90.5 (89.6–91.4)            | 92.6 (92.0–93.3)            | 92.5 (91.7–93.2)            | 88.3 (87.2–89.4)            | 72.8 (70.8–74.9)          |
| Cervix uteri               |  | Women | 81.0 (78.2–83.8)            | 74.2 (70.8–77.6)            | 67.0 (62.4–71.7)            | 54.8 (48.8–60.8)            | 36.5 (30.1–42.9)          |
| Corpus uteri               |  | Women | 87.6 (83.5–91.6)            | 89.2 (87.2–91.2)            | 85.0 (83.3–86.7)            | 76.0 (73.7–78.2)            | 53.8 (50.5–57.1)          |
| Ovary and annexes          |  | Women | 71.2 (66.9–75.5)            | 63.0 (59.3–66.6)            | 51.2 (47.6–54.8)            | 38.2 (34.5–41.9)            | 19.1 (16.1–22.0)          |
| Prostate <sup>a</sup>      |  | Men   | 15-54 y<br>95.2 (93.9–96.5) | 55-64 y<br>96.4 (95.8–97.1) | 65-74 y<br>95.3 (94.6–96.0) | 75-84 y<br>83.6 (82.1–85.0) | ≥85 y<br>40.8 (36.0–45.6) |

|                      |       | Age group        |                  |                   |                  |                  |
|----------------------|-------|------------------|------------------|-------------------|------------------|------------------|
|                      |       | 15-44 y          | 45-54 y          | 55-64 y           | 65-74 y          | ≥75 y            |
| Testicle             | Men   | 97.2 (96.2–98.1) | 92.1 (86.3–97.9) | 96.8 (86.2–107.5) | 65.4 (36.6–94.2) | 57.0 (27.4–86.7) |
| Kidney               | Men   | 80.0 (75.6–84.5) | 76.7 (73.3–80.1) | 72.7 (69.8–75.7)  | 66.9 (63.7–70.2) | 47.7 (43.4–52.1) |
|                      | Women | 90.1 (85.4–94.8) | 78.4 (73.3–83.6) | 74.7 (70.4–79.0)  | 70.2 (65.9–74.5) | 43.2 (38.6–47.8) |
|                      | Both  | 83.5 (80.1–86.8) | 77.2 (74.4–80.0) | 73.3 (70.9–75.7)  | 67.9 (65.3–70.5) | 46.0 (42.8–49.2) |
| Urinary bladder      | Men   | 90.7 (87.9–93.5) | 88.2 (86.4–90.0) | 80.5 (79.1–81.9)  | 74.9 (73.4–76.3) | 57.5 (55.6–59.4) |
|                      | Women | 89.8 (84.4–95.2) | 87.0 (83.6–90.4) | 87.7 (84.8–90.6)  | 77.9 (74.6–81.2) | 56.6 (52.8–60.3) |
|                      | Both  | 90.5 (88.0–93.0) | 88.0 (86.4–89.5) | 81.5 (80.2–82.8)  | 75.3 (73.9–76.6) | 57.3 (55.7–59.0) |
| Brain                | Men   | 54.3 (49.1–59.6) | 18.7 (14.8–22.7) | 6.7 (4.5–8.9)     | 3.8 (2.0–5.6)    | 2.0 (0.7–3.3)    |
|                      | Women | 57.8 (51.4–64.2) | 27.1 (21.3–32.9) | 11.0 (7.8–14.2)   | 3.8 (2.0–5.6)    | 2.7 (1.2–4.2)    |
|                      | Both  | 55.8 (51.7–59.8) | 21.8 (18.5–25.1) | 8.5 (6.6–10.3)    | 3.7 (2.4–5.0)    | 2.4 (1.3–3.4)    |
| Thyroid              | Men   | 97.5 (95.7–99.4) | 93.5 (89.5–97.5) | 93.7 (89.5–97.9)  | 77.1 (68.7–85.4) | 55.8 (40.9–70.6) |
|                      | Women | 99.3 (98.8–99.9) | 98.5 (97.5–99.6) | 96.8 (95.1–98.5)  | 91.8 (88.5–95.0) | 70.4 (63.4–77.4) |
|                      | Both  | 99.0 (98.4–99.5) | 97.6 (96.4–98.7) | 96.0 (94.4–97.6)  | 88.0 (84.7–91.3) | 67.0 (60.5–73.4) |
| Hodgkin lymphoma     | Men   | 91.3 (88.8–93.7) | 77.6 (70.3–84.9) | 72.5 (62.9–82.1)  | 62.7 (51.1–74.2) | 45.4 (28.8–61.9) |
|                      | Women | 95.6 (93.7–97.6) | 92.8 (86.5–99.0) | 76.7 (64.8–88.5)  | 54.9 (38.4–71.3) | 28.2 (16.5–39.8) |
|                      | Both  | 93.2 (91.6–94.8) | 82.5 (77.0–87.9) | 73.9 (66.4–81.5)  | 60.2 (50.7–69.7) | 36.0 (26.1–45.9) |
| Non-Hodgkin lymphoma | Men   | 77.4 (74.4–80.5) | 74.0 (70.6–77.4) | 75.8 (72.7–78.9)  | 63.1 (59.7–66.5) | 42.5 (38.7–46.4) |
|                      | Women | 83.9 (80.4–87.4) | 85.9 (82.6–89.2) | 78.5 (75.5–81.6)  | 73.4 (70.2–76.6) | 44.4 (40.9–47.9) |
|                      | Both  | 79.8 (77.5–82.1) | 78.8 (76.3–81.2) | 77.0 (74.9–79.2)  | 67.7 (65.3–70.1) | 43.5 (40.9–46.1) |
| Myeloma              |       |                  |                  |                   |                  |                  |

|                           |       |                     |                   |                  |                  |                  |
|---------------------------|-------|---------------------|-------------------|------------------|------------------|------------------|
|                           | Men   | 79.9 (68.9–90.9)    | 55.2 (46.4–64.0)  | 56.2 (50.4–61.9) | 43.1 (38.1–48.1) | 24.7 (20.3–29.0) |
|                           | Women | 71.8 (57.0–86.6)    | 65.0 (55.8–74.1)  | 62.6 (56.6–68.7) | 53.6 (48.4–58.8) | 29.1 (24.9–33.4) |
|                           | Both  | 76.7 (67.8–85.7)    | 59.5 (53.1–65.9)  | 59.0 (54.9–63.2) | 47.8 (44.2–51.4) | 26.9 (23.9–30.0) |
| Acute lymphoid leukemia   |       |                     |                   |                  |                  |                  |
|                           | Men   | 51.5 (41.0–62.0)    | 27.3 (10.0–44.5)  | 33.7 (14.1–53.3) | 28.8 (6.3–51.4)  | 16.9 (1.5–32.4)  |
|                           | Women | 52.0 (38.6–65.5)    | 38.5 (18.4–58.7)  | 28.4 (9.6–47.3)  | 6.5 (–3.3–16.3)  | 13.9 (0.8–27.1)  |
|                           | Both  | 51.7 (43.4–60.0)    | 32.6 (19.1–46.1)  | 31.2 (17.3–45.2) | 17.6 (4.3–30.9)  | 14.8 (4.4–25.1)  |
| Chronic lymphoid leukemia |       |                     |                   |                  |                  |                  |
|                           | Men   | 94.8 (83.9–105.7)   | 86.4 (77.7–95.0)  | 89.0 (84.3–93.7) | 79.9 (74.6–85.2) | 58.6 (51.6–65.7) |
|                           | Women | 100.4 (100.4–100.4) | 88.3 (79.4–97.2)  | 89.7 (84.1–95.2) | 84.2 (78.5–90.0) | 62.2 (55.5–68.8) |
|                           | Both  | 96.2 (88.1–104.4)   | 87.1 (80.8–93.4)  | 89.2 (85.6–92.9) | 81.5 (77.5–85.5) | 60.4 (55.5–65.3) |
| Acute myeloid leukemia    |       |                     |                   |                  |                  |                  |
|                           | Men   | 53.6 (46.1–61.1)    | 45.8 (36.5–55.1)  | 27.1 (19.8–34.5) | 11.1 (7.1–15.1)  | 1.8 (0.1–3.5)    |
|                           | Women | 64.9 (57.5–72.4)    | 50.8 (41.2–60.4)  | 33.6 (25.3–41.9) | 20.1 (14.2–26.0) | 2.4 (0.3–4.5)    |
|                           | Both  | 59.0 (53.7–64.4)    | 48.3 (41.6–55.0)  | 30.1 (24.5–35.6) | 14.8 (11.3–18.2) | 2.1 (0.7–3.4)    |
| Chronic myeloid leukemia  |       |                     |                   |                  |                  |                  |
|                           | Men   | 95.5 (90.8–100.2)   | 97.4 (92.1–102.6) | 88.6 (78.6–98.7) | 67.4 (52.6–82.2) | 36.0 (22.4–49.7) |
|                           | Women | 93.6 (86.4–100.8)   | 89.1 (78.3–99.9)  | 87.4 (76.7–98.2) | 80.0 (66.1–93.9) | 43.0 (26.2–59.8) |
|                           | Both  | 94.8 (90.9–98.8)    | 94.6 (89.4–99.7)  | 88.1 (80.6–95.6) | 73.1 (62.6–83.5) | 39.0 (28.3–49.7) |
| Leukemia NOS and others   |       |                     |                   |                  |                  |                  |
|                           | Men   | 70.6 (56.5–84.7)    | 81.5 (68.8–94.1)  | 58.4 (46.1–70.8) | 40.5 (31.7–49.4) | 20.7 (13.0–28.3) |
|                           | Women | 61.4 (42.0–80.9)    | 66.0 (46.8–85.1)  | 46.2 (29.6–62.7) | 44.9 (32.2–57.7) | 20.9 (13.6–28.2) |
|                           | Both  | 67.2 (55.6–78.9)    | 75.8 (64.9–86.8)  | 53.8 (43.6–63.9) | 41.8 (34.5–49.1) | 20.7 (15.4–26.1) |
| All cancers <sup>b</sup>  |       |                     |                   |                  |                  |                  |
|                           | Men   | 74.6 (73.7–75.6)    | 57.1 (56.3–57.9)  | 60.7 (60.1–61.2) | 59.5 (59.0–60.0) | 41.4 (40.8–42.0) |
|                           | Women | 84.0 (83.4–84.7)    | 77.9 (77.3–78.5)  | 71.9 (71.3–72.6) | 62.1 (61.4–62.8) | 41.2 (40.5–42.0) |
|                           | Both  | 80.3 (79.7–80.8)    | 68.2 (67.7–68.7)  | 64.7 (64.3–65.1) | 60.3 (59.9–60.7) | 41.4 (40.9–41.8) |

<sup>a</sup>The International Cancer Survival Standards (ICSS) age groups are used, which vary for prostate cancer. <sup>b</sup>The "all cancers" category excludes non-melanoma skin cancer. Abbreviations: NOS, not otherwise specified.
